# Supplementary material for: Prevalence of text neck posture, smartphone addiction, and its association with neck disorders among university students in the Kingdom of Saudi Arabia during the COVID-19 pandemic
Source: PeerJ. 2022 Dec 15;10:e14443. doi: 10.7717/peerj.14443 (PMC9760021; doi:10.7717/peerj.14443)
Supplement: Supplemental Information 1 [file peerj-10-14443-s001.xlsx]

## Sheet: Sheet1
SNo	Age	Gender	Height	Weight	BMI	Dom Hand	Dept	Edu Qual	Ph -Yrs	Tab - Yrs	Lap - Yrs	Ph- Daily	Ph - Study	Ph- Soc	Ph- Game	Ph- Hold	Text nec	Ph - 12 MS	Neck- Ms	Sh- MS	Elb- MS	Wr- MS	SAS -Tot	SAS - Cat	IP-MET	IP-CAT
PTM-001	22	1	162	57	21.7	2	1	1	12	6	10	6	2	4	2	3	3	2	0	0	0	0	25	1	4236	3
MDL-F-001	20	2	135	40	21.94	2	3	1	14	0	17	4	3	2	1	1	2	2	0	0	0	0	26	1	4110	3
MDL-F-002	22	2	185	55	16.07	2	3	1	12	4	5	6	4	2	1	1	2	2	0	0	0	0	18	1	2373	2
MDL-F-003	20	2	160	65	25.39	3	3	1	9	5	4	5	5	4	2	2	4	1	1	0	0	0	42	2	2020	2
MDL -F-004	20	2	170	98	33.91	2	3	1	6	3	4	4	1	3	0	3	2	1	1	0	0	0	46	2	1946	2
MDL-F-005	22	2	155	49	20.39	2	3	1	9	5	12	5	2	4	0	3	3	2	0	0	0	0	21	1	1980	2
MDL-F-006	22	2	158	80	32.04	2	3	1	9	0	3	3	2	2	0	3	4	1	1	0	1	0	38	2	0	1
MDL-F-007	20	2	156	56	23.01	2	3	1	9	0	3	6	5	4	0	3	3	1	1	0	0	0	43	2	792	1
MDL-F-008	21	2	153	40	17.08	2	3	1	11	4	2	5	3	5	5	1	3	2	0	0	0	0	45	2	2946	2
MDL-F-009	21	2	150	46	20.44	2	3	1	11	2	2	6	5	5	4	1	3	1	1	1	0	0	48	2	3186	3
MDL-F-010	19	2	164	47	17.47	1	3	1	4	1	2	6	4	5	2	2	3	1	1	0	1	0	39	2	3410	3
MDL-F-011	21	2	154	63	26.56	3	3	1	9	5	2	6	5	5	1	2	3	1	1	0	0	0	39	2	1782	2
MDL-F-012	20	2	160	63	24.6	1	3	1	9	0	10	5	5	4	2	3	3	1	0	0	0	0	36	2	1680	2
MDL-F-013	20	2	150	85	37.77	2	3	1	7	0	3	6	4	2	5	3	3	2	0	0	0	0	29	1	594	1
MDL-F-014	20	2	160	50	19053	2	3	1	6	2	4	5	5	0	0	1	1	3	1	0	0	0	37	2	0	1
MDL-F-015	23	2	156	50	20.54	2	3	1	10	4	0	4	0	3	0	1	4	2	0	0	0	0	30	1	0	1
MDL-F-016	20	2	152	53	22.93	2	3	1	10	2	5	6	4	5	3	3	3	1	1	0	0	0	34	2	792	1
MDL-F-017	20	2	155	49	20.4	1	3	1	9	2	4	6	5	4	0	3	2	2	0	0	0	0	31	1	5850	3
MDL-F-018	19	2	160	52	20.31	1	3	6	11	3	6	4	5	5	4	1	2	2	0	0	0	0	31	1	1386	2
MDL-F-019	20	2	163	70	26.35	2	3	1	10	11	5	6	0	5	4	3	3	2	0	0	0	0	30	1	693	2
MDL-F-020	20	2	163	70	26.34	2	3	1	15	7	0	6	2	5	2	3	2	2	0	0	0	0	31	1	0	1
MDL-F-021	22	2	163	75	28.57	1	3	1	13	13	0	6	5	3	3	2	3	1	1	1	1	1	50	2	1386	2
MDL-F-022	22	2	161	70	27	2	3	1	13	10	14	6	0	5	4	3	3	1	1	0	0	0	39	2	6702	3
MDL-F-023	21	2	150	59	26.22	2	3	1	12	2	13	5	4	5	0	1	3	1	0	0	0	0	27	1	891	1
MDL-F-024	22	2	164	55	20.44	2	3	1	8	4	0	4	5	2	0	1	2	2	0	0	0	0	12	1	198	1
MDL-F-025	21	2	154	63	26.56	1	3	1	9	4	0	6	5	5	0	3	3	1	1	1	0	0	48	2	990	2
MDL-F-026	21	2	142	40	19.83	2	3	1	9	3	4	6	2	5	3	1	2	2	0	0	0	0	32	1	947	2
MDL-F-027	20	2	160	45	17.57	2	3	1	11	0	3	6	5	5	0	3	3	1	1	0	0	0	45	2	537	1
MDL-F-028	20	2	160	85	33.2	2	3	1	12	8	12	6	5	5	5	1	3	1	0	0	0	0	51	2	2439	2
MDL-F-029	20	2	75	162	28.57	2	3	1	11	1	13	6	5	5	5	3	1	1	1	1	1	1	35	2	2892	2
`MPT-F-001	25	2	150	70	31.1	2	1	1	8	7	13	6	0	5	4	3	4	1	1	1	1	0	45	2	1485	1
MPT-F-002	33	2	171	75	25.6	2	1	2	10	0	5	3	5	0	0	3	3	2	0	0	0	0	25	1	4986	3
MPT-F-003	30	2	150	56	24.9	2	1	2	10	0	10	6	3	4	1	3	2	1	1	1	1	1	33	2	0	1
MPT-F-004	28	2	166	70	25.4	2	1	2	15	0	15	6	5	5	5	3	3	1	1	1	1	1	39	2	1737	2
MPT-F-005	28	2	158	100	24	1	1	2	15	0	15	5	4	5	1	0	0	3	0	0	0	0	38	2	1977	2
MPT-F-006	29	2	164	63	23.4	2	1	2	15	0	12	5	1	5	1	1	2	2	0	0	0	0	44	2	1773	2
MPT-F-007	26	2	154	75	31.6	2	1	2	12	5	9	4	2	2	0	1	3	2	0	0	0	0	21	1	1980	2
MPT-F-008	28	2	158	62	24.8	2	1	2	10	10	11	5	3	5	0	3	3	1	1	0	0	0	55	2	0	1
MPT-F-009	27	2	160	57	22.3	2	1	2	7	0	0	5	5	5	0	1	3	1	1	0	0	0	35	2	297	1
MPT-F-010	25	2	165	70	25.7	2	1	2	15	10	11	5	2	2	1	1	4	2	0	0	0	0	42	2	1794	2
MPT-F-011	26	2	165	70	25.7	2	1	2	10	2	10	4	5	5	5	1	4	1	0	0	0	1	45	2	990	2
MPT-F-012	28	2	150	45	20	2	1	2	10	0	0	5	4	4	0	1	3	2	0	0	0	0	22	1	0	1
MPT-F-013	30	2	155	66	27.5	2	1	2	13	0	13	4	1	2	0	3	2	1	0	1	0	0	36	2	2826	2
RMI-F-001	21	2	161.2	52.8	20.3	2	6	1	9	9	11	6	2	5	3	1	3	1	1	0	0	1	42	2	396	1
RMI-F-002	20	2	167	75	26.9	2	6	1	9	3	2	6	4	3	0	1	2	1	0	0	0	0	30	1	594	1
RMI-F-003	20	2	157	55	22.3	1	6	1	6	0	3	3	5	3	0	2	2	2	0	0	0	0	16	1	420	1
RMI-F-004	20	2	154	65	27.4	2	6	1	5	0	2	4	4	4	0	0	1	1	0	0	0	0	38	2	693	2
RMI-F-005	21	2	155	56	23.3	2	6	1	9	11	11	6	5	5	5	1	2	1	1	1	1	1	35	2	1386	2
RMI-F-006	20	2	158	47	18.82	2	6	1	11	8	12	6	2	5	1	3	2	1	1	0	0	0	46	2	1464	2
RMI-F-007	20	2	152	46	19.9	2	6	1	10	1	0	6	0	5	0	1	2	2	0	0	0	0	28	1	0	1
RMI-F-008	23	2	166	54	19.59	2	6	1	7	1	6	5	2	2	2	3	3	2	0	0	0	0	25	1	792	2
RMI-F-009	23	2	153	58	24.77	2	6	1	7	3	8	5	2	1	1	3	3	2	0	0	0	0	23	1	1314	2
RMI-F-010	21	2	160	62	24.21	2	6	1	10	8	12	6	2	5	0	3	3	2	0	0	0	0	31	1	3072	3
RMI-F-011	21	2	158	63	25.23	2	6	1	11	10	12	6	5	5	0	3	3	1	1	0	0	0	35	2	2175	2
RMI-F-012	20	2	168	60	21.25	2	6	1	11	4	10	6	0	5	0	1	3	2	0	0	0	0	30	1	1773	2
NRS-F-001	20	2	150	58	23.2	1	2	1	10	2	10	6	4	5	1	3	3	1	1	1	1	0	35	2	5126	3
NRS-F-002	19	2	150	39	21.77	1	2	1	7	9	8	6	5	4	0	3	2	2	0	0	0	0	18	1	1386	2
NRS-F-003	20	2	154	50	21.08	2	2	1	10	0	5	5	3	4	0	3	3	2	0	0	0	0	31	1	570	1
NRS-F-004	22	2	150	48	21.33	1	2	1	7	3	3	5	0	5	0	3	2	2	0	0	0	0	32	1	5631	3
NRS-F-005	23	2	160	50	19.53	2	2	1	10	5	10	5	0	4	4	1	3	1	1	1	0	1	38	2	792	1
NRS-F-006	22	2	159	45	17.79	2	2	1	9	0	6	6	4	4	1	4	3	1	1	0	0	0	34	2	0	1
NRS-F-007	19	2	156	50	20.55	2	2	1	8	0	2	5	4	5	2	3	3	1	1	1	0	0	47	2	1059	2
NRS-F-008	21	2	158	65	26.04	2	2	1	8	3	11	3	0	2	2	3	3	1	1	0	0	0	53	2	4014	1
NRS-F-009	20	2	157	53	21.5	2	2	1	4	1	0	5	3	5	0	1	3	1	1	0	0	0	49	2	1512	2
NRS-F-010	20	2	153	59	25.2	1	2	1	9	11	13	6	0	4	4	2	4	2	0	0	0	0	37	1	891	1
NRS-F-011	19	2	163	70	26.35	2	2	1	8	5	12	5	3	5	5	3	3	1	1	1	0	1	52	2	50	1
NRS-F-012	20	2	165	67	24.61	2	2	1	9	2	6	3	0	3	0	1	4	1	1	0	0	0	50	2	462	1
NRS-F-013	20	2	150	57	25.33	2	2	1	9	2	5	6	4	4	0	3	3	1	1	0	0	0	44	2	0	1
NRS-F-014	22	2	163	49	18.44	2	2	1	10	0	11	6	4	4	0	3	3	1	0	0	0	0	32	1	792	1
NRS-F-015	21	2	158	60	24.03	1	2	1	8	0	8	4	2	3	0	3	3	2	0	0	0	0	32	1	693	2
NRS-F-016	23	2	158	63	25.23	2	2	1	10	0	6	4	4	3	0	1	2	2	0	0	0	0	22	1	693	2
NRS-F-017	21	2	156	49	20.13	2	2	1	10	4	0	6	5	5	5	3	3	2	0	0	0	0	25	1	1314	2
NRS-F-018	22	2	160	76	29.68	2	2	1	7	0	10	6	4	5	0	1	4	1	1	1	0	0	37	2	0	1
NRS-F-019	22	2	158	61	24.43	1	2	1	6	2	7	5	4	1	0	4	2	0	0	0	0	0	13	1	1791	2
NRS-F-020	22	2	160	50	19.53	2	2	1	7	4	6	5	0	5	4	3	3	2	0	0	0	0	16	1	6372	3
NRS-F-021	21	2	156	95	18.49	2	2	1	9	12	10	6	0	5	4	1	3	2	0	0	0	0	32	1	0	1
NRS-F-022	20	2	167	66	23.66	2	2	2	1	9	1	2	2	0	5	7	4	2	1	1	0	0	40	2	594	1
NRS-F-023	20	2	162	41	15.62	2	2	1	11	6	13	4	0	4	0	3	4	1	0	0	0	1	22	1	693	2
NRS-F-024	21	2	155	45	18.73	2	2	1	8	2	5	5	2	5	0	1	3	1	1	1	0	0	49	2	1584	2
NRS-F-025	21	2	155	51	21.22	2	2	1	8	0	2	6	3	5	0	3	3	1	1	0	0	1	48	2	264	1
NRS-F-026	19	2	152	39	16.88	2	2	1	6	2	12	3	2	3	0	1	3	1	1	0	0	0	48	2	297	1
NRS-F-027	21	2	163.5	54	20.32	2	2	1	12	3	0	6	2	5	2	3	1	2	0	0	0	0	13	1	4158	3
NRS-F-028	21	2	161	75	28.93	2	2	1	5	6	0	6	0	3	2	1	3	2	0	0	0	0	31	1	149	1
NRS-F-029	20	2	156	43	17.66	2	2	1	10	2	5	6	0	5	0	1	3	2	0	0	0	0	16	1	3305	3
NRS-F-030	20	2	152	40	17.3	2	2	1	7	3	6	6	1	4	0	1	3	2	0	0	0	0	32	1	3093	3
NRS-F-031	21	2	166	58	21.04	2	2	1	12	4	0	6	2	4	2	3	1	2	0	0	0	0	26	1	4158	3
NRS-F-032	20	2	163	62	23.33	2	2	1	10	0	2	5	0	5	4	3	3	1	1	1	0	0	43	2	372	1
NRS-F-033	20	2	160	47.7	18.63	2	2	1	6	2	2	6	0	4	0	1	3	1	1	1	0	0	35	2	2826	2
NRS-F-034	20	2	160	59	23.04	2	2	1	12	2	15	6	0	5	0	3	3	1	1	0	0	0	34	2	347	1
NRS-F-035	21	2	155	55	22.89	2	2	1	9	2	8	6	5	3	0	3	2	1	1	1	0	0	34	2	0	1
NRS-F-036	21	2	152	58	25.1	2	2	1	7	3	3	6	3	5	0	1	4	1	1	0	0	1	39	2	1973	2
NRS-F-037	21	2	150	47	20.88	2	2	1	8	0	2	6	5	4	0	1	3	1	1	1	1	1	52	2	1824	2
NRS-F-038	20	2	152	45	19.47	2	2	1	8	7	10	4	5	2	0	1	2	1	0	0	0	0	24	1	1485	2
NRS-F-039	20	2	162	60	22.86	2	2	1	10	2	6	5	3	4	1	1	3	1	1	0	0	1	44	2	0	1
NRS-F-040	21	2	150	50	22.2	2	2	1	9	2	4	4	3	4	0	1	3	2	0	0	0	0	27	1	198	1
PTF-001	19	2	158	60	24	2	1	1	8	1	1	5	0	5	1	1	2	2	0	0	0	0	36	2	894	2
PTF-002	20	2	160	50	19.5	2	1	1	10	3	3	6	2	5	0	1	3	1	1	0	0	0	35	2	99	1
PTF-003	20	2	168	48	17	2	1	1	12	10	4	6	4	5	4	1	2	1	1	0	0	1	38	2	4540	3
PTF-004	21	2	160	45	17.6	1	1	1	10	3	6	5	0	4	1	2	3	1	1	0	0	0	25	1	3159	3
PTF-005	20	2	160	69.5	27.1	2	1	1	10	2	10	6	0	3	3	3	2	1	1	0	0	0	24	1	396	1
PTF-006	19	2	162	52	19.8	3	1	1	9	9	5	5	1	1	0	2	0	0	0	0	0	1	25	1	792	1
PTF-007	22	2	164	44	16.4	2	1	1	7	1	10	5	0	3	0	3	3	2	0	0	0	0	23	1	891	1
PTF-008	20	2	165	62	22.8	1	1	1	5	3	0	5	3	5	0	1	2	2	0	0	0	0	29	1	2493	2
PTF-009	21	2	160	47	18.4	2	1	1	15	10	4	6	4	4	2	1	4	1	1	1	0	1	52	2	3465	3
PTF-010	20	2	152	55	23.8	2	1	1	2	1	1	3	5	1	0	1	2	2	0	0	0	0	11	1	896	2
PTF-011	20	2	154	46	19.4	2	1	1	5	2	6	6	5	0	0	2	3	2	1	1	0	0	43	2	1152	2
PTF-012	20	2	155	54	22.5	2	1	1	7	2	3	6	0	5	0	3	2	1	1	0	0	0	50	2	1320	2
PTF-013	20	2	153	105	44.9	1	1	1	3	6	0	6	4	3	3	3	2	1	1	1	0	1	27	1	924	2
PTF-014	20	2	158	56	22.4	2	1	1	3	1	0	5	0	3	0	1	2	1	1	1	0	0	33	2	2772	2
PTF-015	20	2	154	53	22.3	2	1	1	10	2	10	5	0	4	0	1	3	2	0	0	0	0	32	1	1386	2
PTF-016	20	2	160	51	19.9	2	1	1	9	10	0	6	0	5	0	1	2	1	1	1	0	1	48	2	3306	3
PTF-017	21	2	159	72	28.5	2	1	1	10	2	9	6	1	5	0	3	3	1	1	0	0	1	47	2	1584	1
PTF-018	20	2	155	50	20.8	2	1	1	10	5	0	6	5	2	1	3	3	1	1	1	1	1	39	2	0	1
PTF-019	21	2	165	51	18.7	2	1	1	9	2	4	4	0	4	1	1	2	2	0	0	0	0	29	1	198	1
PTF-020	20	2	162	55	21.5	2	1	1	11	1	3	6	5	5	0	1	3	1	0	0	0	0	24	1	693	2
PTF-021	20	2	170	78	27	2	1	1	10	14	14	6	0	5	2	3	3	1	1	0	0	0	51	2	1653	2
PTF-022	20	2	149	33	14.9	2	1	1	5	2	12	6	5	5	0	3	2	2	0	0	0	0	21	1	198	1
PTF-023	20	2	164	51	19	1	1	1	9	12	10	6	0	5	3	2	2	2	0	0	0	0	32	1	394	1
PTF-024	21	2	163	60	22.6	2	1	1	12	6	4	6	4	5	1	1	3	1	1	0	0	1	43	2	3785	3
PTF-025	19	2	158	73	28.1	2	1	1	10	4	11	6	1	5	0	1	2	2	0	0	0	0	46	2	2979	2
PTF-026	22	2	156	53	21.8	2	1	1	15	15	5	6	3	5	2	1	4	1	1	1	0	1	42	2	1733	2
PTF-027	22	2	156	77	31.6	2	1	1	10	1	12	5	0	4	0	3	3	1	0	1	0	0	25	1	933	2
PTF-028	21	2	157	59	23.9	2	1	1	10	6	6	4	3	4	0	3	1	1	1	0	0	0	25	1	0	1
PTF-029	20	2	159	52	20.6	1	1	1	9	11	8	4	0	3	1	2	2	1	0	0	0	1	22	1	3785	3
PTF-030	20	2	160	45	17.6	2	1	1	10	2	4	4	5	5	1	3	4	1	1	0	0	0	17	1	2034	2
PTF-031	20	2	164	50	18.6	2	1	1	8	1	0	4	5	3	3	3	3	1	1	1	0	0	36	2	2988	2
PTF-032	21	2	163	45	16.9	2	1	1	10	5	12	6	0	5	0	1	2	1	1	1	0	0	42	2	891	1
PTF-033	21	2	157	45	18.3	2	1	1	5	5	7	6	5	4	2	1	3	2	0	0	0	0	27	1	565	1
PTF-034	22	2	156	53	21.8	2	1	1	15	15	5	6	3	5	2	1	4	1	1	1	0	1	47	2	1732	2
PTF-035	19	2	165	59	21.5	1	1	1	10	10	12	6	0	5	0	3	2	2	0	0	0	0	45	2	1580	2
PTF-036	21	2	169	62	21.7	2	1	1	9	7	13	5	0	5	0	3	3	1	1	0	0	1	33	2	99	1
PTF-037	21	2	160	50	19.5	2	1	1	9	10	0	6	0	4	0	3	2	1	1	1	0	0	33	2	480	1
PTF-038	21	2	170	74	25.6	2	1	1	11	5	4	5	0	3	1	1	3	1	1	1	0	0	34	2	1732	1
PTF-039	20	2	155	67	27.9	2	1	1	10	2	4	6	1	5	3	1	4	1	1	1	1	1	21	1	396	1
PTF-040	22	2	160	97	18.4	2	1	1	15	10	4	6	0	5	5	1	4	1	1	1	0	1	56	2	1733	2
PTF-041	22	2	156	64	26.3	2	1	1	10	4	9	4	3	4	0	1	3	1	1	1	0	0	37	2	1596	2
PTF-042	23	2	154	49	20.7	1	1	1	7	0	9	6	5	3	1	2	3	1	0	0	0	1	47	2	4239	3
PTF-043	20	2	156	60	24.6	2	1	1	8	7	3	5	0	5	0	3	3	1	1	0	0	0	34	2	990	2
PTF-044	21	2	155	57	23.7	2	1	1	8	7	10	6	2	5	1	3	3	1	1	0	0	0	33	2	3024	3
PTF-045	19	2	150	44	19.6	2	1	1	9	5	1	4	0	2	5	3	1	2	0	0	0	0	42	2	693	2
PTF-046	19	2	171	56	19.2	2	1	1	6	9	11	5	2	5	1	3	2	2	0	0	0	0	15	1	1188	1
PTF-047	21	2	155	48	20	2	1	1	6	6	8	6	3	5	1	1	3	2	0	0	0	0	31	1	744	1
PTF-048	20	2	152	40	17.3	2	1	1	3	3	0	4	0	4	1	1	3	1	1	0	0	0	44	2	1866	2
PTF-049	18	2	165	80	29.4	2	1	1	6	3	1	5	0	5	0	1	4	1	0	1	0	0	35	2	0	1
PTF-050	23	2	153	54	23.1	2	1	1	9	0	3	6	5	1	1	1	4	1	1	1	0	0	18	1	0	1
PTF-051	20	2	153	58	24.8	2	1	1	5	0	2	8	0	5	2	1	2	1	0	0	0	1	42	2	0	1
PTF-052	20	2	164	85	31.6	2	1	1	5	9	3	6	5	4	0	3	3	1	1	1	0	0	34	2	1386	2
PTF-053	20	2	160	58	22.7	2	1	1	10	12	15	6	1	5	0	1	3	1	1	1	0	0	47	2	10080	3
PTF-054	21	2	152	60	26	2	1	1	6	8	8	3	0	2	2	3	3	2	0	0	0	0	20	1	693	2
PTF-055	20	2	155	58	24.1	2	1	1	8	3	7	6	2	5	2	1	2	2	0	0	0	0	41	2	10080	3
PTF-056	20	2	170	69	23.9	2	1	1	7	10	0	6	1	5	0	1	3	1	1	1	0	1	41	2	2784	2
PTF-057	19	2	156	61	25.1	2	1	1	8	1	0	6	3	5	5	1	4	2	0	0	0	0	49	2	0	1
PTF-058	22	2	163	88	33.1	2	1	1	10	4	6	4	0	4	0	1	3	2	0	0	0	0	50	2	95	1
PTF-059	21	2	174	47	15.5	2	1	1	9	11	6	6	0	5	0	1	3	1	0	0	0	0	24	1	2622	2
PTF-060	23	2	165	40	16.4	2	1	1	11	2	11	6	0	4	0	1	3	2	0	0	0	0	49	2	896	2
PTF-061	22	2	160	50	19.5	2	1	1	14	5	10	6	4	5	1	1	3	1	1	1	0	0	34	2	0	1
PTF-062	20	2	150	65	28.9	2	1	1	12	5	0	5	5	2	1	1	2	2	0	0	0	0	29	1	3543	3
PTF-063	20	2	155	48	20	3	1	1	6	4	4	6	2	5	2	3	3	1	1	1	0	0	54	2	1386	2
PTF-064	23	2	160	54	21.1	2	1	1	7	4	9	6	5	5	5	1	4	1	1	1	0	1	58	2	693	2
PTF-065	21	2	156	45	18.5	1	1	1	7	2	2	3	2	2	0	4	3	2	0	0	0	0	24	1	1386	2
PTF-066	21	2	160	55	21.5	2	1	1	10	0	15	6	5	5	5	3	3	2	0	0	0	0	29	1	594	1
PTF-067	21	2	168	61	21.6	2	1	1	15	15	17	6	0	5	4	1	3	2	0	0	0	0	31	1	420	1
PTF-068	21	2	164	65	24.2	2	1	1	6	10	12	6	3	4	0	1	3	2	0	0	0	0	27	1	2466	2
PTF-069	20	2	167	41	14.7	2	1	1	8	1	11	6	5	2	1	1	4	1	1	0	0	0	41	2	693	2
PTF-070	20	2	160	52	20.3	2	1	1	9	2	2	4	0	4	0	3	2	2	0	0	0	0	22	1	0	1
PTF-071	22	2	163	56	21.1	2	1	1	11	12	7	5	0	4	2	1	3	1	0	1	0	0	43	2	1476	2
PTF-072	20	2	168	54	19.1	1	1	1	7	4	10	6	4	2	5	2	4	2	0	0	0	0	32	1	1746	2
PTF-073	21	2	165	65	23.9	2	1	1	7	7	7	6	5	3	0	1	4	1	1	1	0	0	41	2	297	1
PTF-074	22	2	157	47	19.1	2	1	1	14	6	5	6	0	5	0	3	3	1	1	1	0	0	43	2	198	1
PTF-075	21	2	170	74	25.6	2	1	1	10	6	0	6	0	4	5	1	5	2	0	0	0	0	32	1	1386	2
PTF-076	20	2	161	50	19.3	2	1	1	12	8	15	5	0	4	0	1	2	1	1	0	0	0	41	2	1057	2
PPT-M-001	25	1	173	91	30.4	2	1	1	11	1	12	6	0	3	0	1	3	2	0	0	0	0	19	1	1293	2
PPT-M-002	23	1	163	52	19.6	2	1	1	8	9	11	4	2	4	1	1	1	2	0	0	0	0	11	1	3564	3
PPT-M-003	21	1	170	95	32.9	2	1	1	10	0	4	6	3	5	5	1	3	2	0	0	0	0	34	2	297	1
PPT-M-004	22	1	173	145	48.4	2	1	1	10	3	4	6	0	3	0	1	3	2	0	0	0	0	29	1	0	1
PPT-M-005	22	1	170	51	17.6	2	1	1	7	4	10	4	2	3	0	1	2	2	0	0	0	0	19	1	2565	3
MMET-001	35	1	177	90	28.7	2	1	1	10	5	10	6	4	4	0	1	3	1	1	0	0	0	42	2	0	1
MMET-002	32	1	170	73	25.3	2	4	2	15	0	15	6	2	5	0	3	2	2	0	0	0	0	47	2	0	1
MMET-003	35	1	168	72	25.5	2	4	2	10	0	12	4	3	2	1	3	4	1	1	0	0	0	40	2	0	1
MMET-004	31	1	172	100	33.8	1	4	2	10	0	12	6	5	0	0	1	3	1	1	0	0	0	32	2	0	1
MMET-005	31	1	176	113	36.5	2	4	2	10	0	15	5	0	3	3	3	3	1	1	1	0	0	36	2	0	1
MMET-006	32	1	180	70	21.6	2	4	2	15	0	14	6	3	5	0	3	2	1	1	0	0	0	35	2	5088	3
MMET-007	34	1	169	113	39.6	2	4	2	10	5	15	6	3	3	3	1	3	1	1	0	0	0	36	2	0	1
MMET-008	32	1	171	79	27	3	4	2	16	7	6	5	5	0	0	1	2	1	1	0	0	1	34	2	0	1
MMET-009	28	1	172	80	27	2	4	2	10	10	10	4	2	3	2	1	4	2	0	0	0	0	20	1	1980	2
MMET-010	35	1	165	86	31.6	2	4	2	8	0	1	6	2	5	0	3	4	1	1	0	0	0	52	2	0	1
MSCN-M-001	40	1	165	63	23.1	2	2	2	10	5	14	5	3	4	0	1	2	1	1	0	0	0	33	2	990	2
MSCN-M-002	44	1	163	74	27.9	2	2	2	12	0	16	5	3	2	1	1	2	1	0	1	0	0	20	1	0	1
MSCN-M-003	35	1	175	68	22.2	2	2	2	7	0	13	6	5	5	5	1	3	1	1	1	1	1	48	2	0	1
MSCN-M-004	35	1	168	73	25.9	1	2	2	5	0	7	4	3	2	0	2	3	1	0	1	0	0	33	2	495	1
MSCN-M-005	32	1	179	82	25.6	2	2	2	13	4	8	4	3	2	1	2	3	1	1	1	0	0	24	1	198	1
MSCN-M-006	30	1	174	77	25.4	2	2	2	10	5	6	4	0	3	1	3	2	2	0	0	0	0	25	1	792	1
MSCN-M-007	31	1	168	62	22	2	2	2	2	0	0	3	3	2	0	1	4	1	1	0	0	0	18	1	1950	2
MSCN-M-008	37	1	170	71	24.6	2	2	2	8	0	13	6	0	5	0	1	3	1	1	0	0	0	45	1	0	1
MSCN-M-009	35	1	173	81	27.1	2	2	2	12	0	15	5	3	4	0	1	1	2	0	0	0	0	25	1	396	1
MSCN-M-010	40	1	171	82	28	2	2	2	12	12	20	6	0	5	0	1	2	2	0	0	0	0	46	2	396	1
MSCN-M-011	33	1	176	76	24.5	2	2	2	18	0	16	6	0	4	0	1	4	1	1	1	0	0	33	2	4733	3
MPTM-001	30	1	172	86	29.1	2	1	2	11	11	11	5	0	5	0	3	2	1	1	0	0	0	24	1	1067	1
MPTM-002	25	1	170	96	33.2	2	1	2	10	7	7	5	4	5	1	1	3	1	1	0	0	1	38	2	1386	2
MPTM-003	25	1	179	109	34	2	1	2	10	7	7	6	2	5	2	3	4	1	1	0	0	0	39	2	693	2
MPTM-004	32	1	173	98	32.7	2	1	2	10	0	0	6	2	5	1	1	3	1	1	0	0	1	80	2	386	1
MPTM-005	27	1	167	67	24	2	1	2	8	0	8	3	3	2	0	1	3	1	1	0	0	0	31	2	495	1
MPTM-006	27	1	176	103	33.3	2	1	2	17	4	10	4	0	4	0	1	2	1	1	0	0	0	38	2	990	2
MPTM-007	37	1	171	98	33.5	1	1	2	5	0	10	3	0	2	0	3	2	1	1	1	0	0	32	2	0	1
MPTM-008	24	1	170	85	29.4	2	1	2	10	0	0	5	3	3	0	1	1	1	1	0	0	0	35	2	3594	3
MPTM-009	29	1	169	77	27	2	1	2	10	11	15	6	0	5	0	1	3	1	1	0	0	0	38	2	960	1
MPTM-010	26	1	172	80	27	2	1	2	11	11	11	6	2	3	2	1	4	1	1	1	0	0	48	2	1200	2
MPTM-011	30	1	173	80	26.7	2	1	2	15	0	10	3	0	3	0	3	3	2	0	0	0	0	12	1	0	1
MPTM-012	30	1	162	73	27.8	2	1	2	15	5	10	4	0	2	0	1	3	2	0	0	0	0	29	1	396	1
MPTM-013	28	1	178	71	22.4	2	1	2	13	6	10	6	4	5	0	1	3	2	0	0	0	0	28	1	0	1
MPTM-014	26	1	170	95	32.9	2	1	2	7	5	14	3	5	4	1	1	3	1	0	1	0	0	46	2	396	1
RMI-M-001	21	1	179	80	25	2	6	1	10	5	7	6	4	5	1	1	3	2	0	0	0	0	30	1	3786	3
RMI-M-002	22	1	178	60	18.7	2	6	1	10	3	5	6	0	2	5	3	4	2	0	0	0	0	32	2	2034	2
RMI-M-003	22	1	160	52	20.3	2	6	1	11	3	0	5	4	4	1	3	2	1	1	0	0	0	58	2	1398	2
RMI-M-004	21	1	172	56	18.9	2	6	1	10	2	9	6	0	5	5	1	3	1	0	0	0	0	53	2	198	1
RMI-M-005	22	1	185	100	29.2	2	6	1	10	10	4	6	0	5	3	1	4	1	1	0	0	1	47	2	0	1
RMI-M-006	21	1	175	72	23.5	2	6	1	11	7	9	6	0	3	3	1	2	1	0	1	0	0	46	2	2316	2
RMI-M-007	22	1	160	53	20.7	2	6	1	10	4	2	6	0	5	0	1	3	2	0	0	0	0	27	1	1638	2
RMI-M-008	21	1	172	95	32.1	2	6	1	12	5	10	5	0	5	0	1	3	2	0	0	0	0	30	1	0	1
RMI-M-009	23	1	170	95	32.9	2	6	1	10	5	10	6	2	5	5	3	4	1	1	0	0	0	34	2	4500	3
RMI-M-010	22	1	165	68	25	2	6	1	10	0	10	6	4	4	0	1	1	2	0	0	0	0	30	1	5280	3
RMI-M-011	23	1	169	48	16.8	2	6	1	10	0	3	5	0	4	3	1	3	2	0	0	0	0	28	1	891	1
RMI-M-012	22	1	164	68	25.3	2	6	1	9	2	5	5	4	0	0	1	1	2	0	0	0	0	20	1	3390	3
RMI-M-013	23	1	170	64	22.1	2	6	1	11	4	7	4	5	3	1	1	1	2	0	0	0	0	30	1	2880	3
RMI-M-014	22	1	174	96	31.7	2	6	1	12	0	0	4	3	3	1	1	3	2	0	0	0	0	29	1	0	1
RMI-M-015	22	1	170	5	17.3	2	6	1	10	4	6	5	0	4	0	3	2	2	0	0	0	0	30	1	885	1
RMI-M-016	24	1	167	80	28.7	2	6	1	8	2	10	5	0	5	0	3	4	1	1	1	1	1	56	2	0	1
RMI-M-017	23	1	172	85	28.7	2	6	1	10	0	10	5	4	5	3	1	1	1	1	0	1	0	31	2	297	1
RMI-M-018	22	1	173	63	21	2	6	1	8	3	12	6	0	4	5	1	4	1	1	0	0	0	55	2	1920	1
RMI-M-019	22	1	166	56	20.3	2	6	1	11	2	1	3	0	4	0	3	3	2	0	0	0	0	14	1	1782	1
RMI-M-020	24	1	176	57	18.4	2	6	1	11	3	5	5	2	3	0	1	3	1	1	0	0	0	46	2	1059	1
RMI-M-021	22	1	170	52	18	2	6	1	12	3	10	6	2	2	4	1	3	2	0	0	0	0	53	2	1386	2
MET-M-001	23	1	169	72	25.2	2	4	1	12	8	15	5	3	4	0	1	4	1	1	1	0	0	46	2	6710	3
MET-M-002	23	1	173	79	26.4	2	4	1	13	0	5	6	2	5	0	3	3	1	1	0	0	0	46	2	6057	3
MET-M-003	21	1	171	74	25.3	2	4	1	11	0	11	6	5	5	4	1	1	1	1	0	0	0	41	2	8994	3
MET-M-004	23	1	170	58	20.1	2	4	1	10	0	1	6	0	0	5	3	2	2	0	0	0	0	40	2	990	2
MET-M-005	21	1	165	65	23.9	2	4	1	9	0	4	3	0	3	0	1	3	2	0	0	0	0	30	1	675	2
MET-M-006	21	1	168	47	16.7	2	4	1	8	9	11	6	3	5	1	1	3	1	1	1	0	0	33	2	0	1
MET-M-007	22	1	160	48	18.7	2	4	1	10	2	8	5	5	3	0	1	4	1	1	0	0	0	34	2	231	1
MET-M-008	21	1	177	70	22.3	2	4	1	12	6	12	6	0	5	0	1	2	1	0	0	0	0	40	2	3297	3
MET-M-009	22	1	178	86	27.1	2	4	1	12	5	7	6	0	5	0	1	2	2	0	0	0	0	29	1	0	1
MET-M-010	23	1	176	83	26.8	2	4	1	13	5	5	6	5	5	5	3	4	1	1	0	0	0	50	2	198	2
MET-M-011	26	1	174	59	19.5	2	4	1	10	10	12	4	4	1	2	1	2	2	0	0	0	0	12	1	0	1
MET-M-012	22	1	168	62	22	2	4	1	10	2	4	6	0	4	2	1	2	2	0	0	0	0	24	1	297	1
MET-M-013	22	1	180	95	29.3	2	4	1	13	6	10	5	4	4	2	1	3	1	1	0	0	0	34	2	792	1
MET-M-014	24	1	180	82	25.3	2	4	1	7	5	4	6	0	5	1	3	3	1	0	0	0	0	39	2	7428	3
MET-M-015	22	1	171	68	23.3	2	4	1	6	0	12	3	0	6	6	2	0	0	0	0	0	0	23	1	0	1
MET-M-016	21	1	162	55	21	2	4	1	12	0	2	3	0	2	0	1	2	2	0	0	0	0	12	1	1280	2
MET-M-017	21	`	170	75	26	2	4	1	7	3	0	4	3	3	0	3	4	1	1	0	0	0	37	2	0	1
MET-M-018	22	1	168	75	26.6	2	4	1	8	0	7	2	0	2	0	3	2	1	1	0	0	0	31	2	0	1
MET-M-019	21	1	173	64	21.4	2	4	1	15	2	10	6	2	5	0	1	3	2	0	0	0	0	30	1	2535	2
MET-M-020	20	1	172	57	19.3	2	4	1	4	2	5	4	0	4	0	1	1	1	0	0	0	0	32	2	66	1
MET-M-021	20	1	176	65	21	2	4	1	12	10	16	6	1	5	4	3	3	1	1	0	0	0	40	2	1257	1
MET-M-022	19	1	182	89	26.9	2	4	1	7	5	10	3	1	3	0	1	2	2	0	0	0	0	23	1	2376	2
MET-M-023	20	1	175	75	24.5	2	4	1	10	5	10	6	0	5	0	1	3	1	1	0	0	0	38	2	0	1
MET-M-024	22	1	172	63	21.3	3	4	1	8	2	10	6	5	4	1	3	4	2	0	0	0	0	26	1	1200	2
PTM-001	22	1	162	57	21.1	2	1	1	12	6	10	6	2	4	2	3	3	2	0	0	0	0	25	1	4236	2
PTM-002	23	1	173	90	30.1	2	1	1	8	0	2	5	3	3	1	3	2	2	0	0	0	0	30	1	9660	3
PTM-003	23	1	175	50	16.3	2	1	1	10	0	0	6	5	5	3	3	2	2	0	0	0	0	19	1	1980	1
PTM-004	22	1	166	50	18.1	2	1	1	10	0	4	6	5	5	4	3	2	2	0	0	0	0	30	1	1980	1
PTM-005	23	1	170	52	18	2	1	1	10	10	15	6	0	5	0	1	3	1	1	1	0	0	48	2	1836	2
PTM-006	25	1	178	110	34.7	2	1	1	13	6	10	3	3	1	0	1	3	2	0	0	0	0	23	1	1590	2
PTM-007	22	1	170	78	27	2	1	1	10	4	0	3	0	2	1	3	4	1	1	0	0	0	34	2	0	1
PTM-008	24	1	174	86	28.4	1	1	1	11	5	0	5	5	5	0	3	2	1	0	0	0	0	34	2	2346	2
PTM-009	25	1	179	75	23.4	2	1	1	15	8	15	5	0	4	0	1	2	2	0	0	0	0	25	1	693	2
PTM-010	22	1	173	70	23.4	2	1	1	10	8	8	4	0	4	0	1	3	2	0	0	0	0	29	1	2190	2
PTM-011	22	1	174	60	19.8	2	1	1	10	0	8	4	2	4	0	1	4	1	1	0	0	0	36	2	3465	1
PTM-012	20	1	158	65	26	2	1	1	10	5	12	4	2	5	0	1	4	1	1	0	0	0	44	2	3465	2
PTM-013	21	1	177	68.5	21.9	2	1	1	11.5	13.5	12.5	6	0	5	5	3	2	2	0	0	0	0	27	1	4986	3
PTM-014	21	1	172	49	16.6	2	1	1	10.5	10	10	4	0	5	4	3	3	1	1	0	0	0	42	2	1494	2
PTM-015	22	1	158	65	26	2	1	1	11	4	14	4	2	3	1	1	2	1	1	0	0	0	33	2	0	1
PTM-016	22	1	165	65	23.9	2	1	1	12	1	3	4	0	4	1	1	3	1	1	0	0	0	50	2	297	1
PTM-017	21	1	185	80	23.4	2	1	1	10	0	5	5	1	5	2	1	1	1	1	1	0	0	34	2	1039	2
PTM-018	28	1	166.7	54	19.4	2	1	1	15	0	18	4	0	3	0	1	2	2	0	0	0	0	18	1	1200	2
PTM-019	22	1	166	70	25.4	2	1	1	10	8	7	6	0	5	0	1	4	1	1	0	0	0	45	2	198	1
PTM-020	22	1	170	50	17.3	2	1	1	10	0	4	5	2	5	0	1	2	2	0	0	0	0	25	1	198	1
PTM-021	23	1	173	59	19.7	2	1	1	10	12	4	6	2	5	0	3	2	2	0	0	0	0	34	2	149	1
PTM-022	22	1	176	68	22	2	1	1	10	9	4	6	4	4	4	3	2	2	0	0	0	0	20	1	1386	2
PTM-023	21	1	173	105	35.1	2	1	1	9	2	10	4	2	4	3	1	1	2	0	0	0	0	30	1	198	1
PTM-024	21	1	180	70	21.6	2	1	1	11	3	5	4	2	2	2	1	1	2	0	0	0	0	31	2	396	1
PTM-025	23	1	175	69	22.5	2	1	1	11	0	7	6	4	5	5	1	3	1	1	0	0	0	58	2	657	1
PTM-026	21	1	173	74	24.7	2	1	1	9	0	4	5	2	2	2	1	2	2	0	0	0	0	26	1	0	1
PTM-027	24	1	164	73	27.1	2	1	1	5	0	9	10	4	5	2	1	4	1	1	0	0	0	41	2	990	2
PTM-028	22	1	180	80	24.7	1	1	1	11	2	11	3	0	3	2	2	4	1	1	0	0	1	36	2	743	2
PTM-029	19	1	171	57	19.5	2	1	1	9	2	7	4	1	1	0	2	0	0	0	0	0	0	19	1	5955	3
PTM-030	20	1	178	65	20.5	2	1	1	7	0	0	6	2	5	2	3	3	1	1	0	0	0	31	2	1977	1
PTM-031	24	1	175	125	40.8	1	1	1	10	10	9	5	5	4	3	2	3	1	1	0	0	1	35	2	1356	1
PTM-032	27	1	170	58	20.1	2	1	1	10	4	5	5	2	4	0	3	2	1	1	1	1	1	86	2	5394	3
PTM-033	20	1	167	80	28.7	1	1	1	10	0	1	5	5	2	0	3	2	2	0	0	0	0	12	1	1386	1
PTM-034	21	1	176	45	14.5	2	1	1	8	0	0	6	5	5	0	3	1	2	0	0	0	0	22	1	3786	3
PTM-035	23	1	162	73	22.8	2	1	1	10	0	0	5	2	2	1	1	3	2	0	0	0	0	24	1	891	1
PTM-036	20	1	174	85	28.1	2	1	1	7	9	11	4	3	3	0	1	1	2	0	0	0	0	30	1	1650	2
PTM-037	22	1	171	60	20.5	2	1	1	11	13	13	6	0	4	5	1	4	2	0	0	0	0	28	1	720	1
PTM-038	21	1	174	72	23.8	2	1	1	10	5	5	6	0	4	0	3	3	2	0	0	0	0	22	1	0	1
PTM-039	19	1	174	78	25.8	2	1	1	6	5	1	5	5	4	0	3	3	1	1	0	0	0	52	2	0	1
PTM-040	20	1	177	95	30.3	2	1	1	11	3	1	6	2	5	2	1	3	2	0	0	0	0	23	1	0	1
PTM-041	21	1	162	53	20.2	2	1	1	11	12	15	6	3	5	1	1	3	2	0	0	0	0	23	1	924	2
PTM-042	21	1	170	78	27	2	1	1	10	2	3	6	5	5	1	3	3	2	0	0	0	0	25	1	2507	1
PTM-043	21	1	178	80	25.5	2	1	1	10	0	0	6	4	5	5	3	2	2	0	0	0	0	28	1	1386	2
PTM-044	23	1	170	58	20.1	2	1	1	11	11	9	5	3	3	0	1	1	2	0	0	0	0	26	1	1650	2
PTM-045	20	1	187	103	31.4	2	1	1	10	2	3	6	3	5	0	1	3	2	0	0	0	0	18	1	1554	2
PTM-046	21	1	184	114	33.7	2	1	1	10	10	7	4	0	4	0	1	2	2	0	0	0	0	37	2	0	1
PTM-047	23	1	170	54	18.7	2	1	1	6	0	3	4	0	4	0	3	2	2	0	0	0	0	26	1	4590	3
PTM-048	22	1	174	79	26.1	2	1	1	15	0	10	6	4	4	0	1	1	1	1	0	0	0	34	2	990	2
PTM-049	20	1	164	67	24.9	2	1	1	8	0	0	6	2	5	5	1	2	2	0	0	0	0	21	1	2295	2
PTM-050	20	1	170	80	27.7	2	1	1	6	0	2	5	2	4	0	3	2	2	0	0	0	0	29	1	0	1
PTM-051	20	1	175	110	35.9	2	1	1	8	0	5	6	2	2	0	3	2	1	1	0	0	0	38	2	1413	2
PTM-052	23	1	166	90	32.7	1	1	1	10	1	10	6	5	3	2	3	4	1	0	0	0	0	22	1	297	1
PTM-053	19	1	171	78	26.7	2	1	1	8	0	5	5	0	4	0	1	2	2	0	0	0	0	18	1	1516	2
PTM-054	20	1	179	64	20	2	1	1	7	0	3	6	5	5	0	1	2	2	0	0	0	0	20	1	2274	2
PTM-055	21	1	180	87	26.9	2	1	1	10	0	10	6	0	5	5	3	3	2	0	0	0	0	23	1	1386	2
PTM-056	20	1	180	74	22.8	2	1	1	8	8	8	6	0	5	0	3	3	2	0	0	0	0	37	2	1485	2
PTM-057	23	1	171	98	33.5	2	1	2	10	0	5	5	3	5	0	1	2	1	0	0	0	1	39	2	990	2
